# Supplementary material
Source: publisher figshare collection journal article supplement (https://gsapubs.figshare.com/ndownloader/files/34594583)
Supplement: Supplementary file 1 [file 34594583]

## Sheet: PlotDat2
Source sheet	U-Pb Data Table	0.2	621.389	1	621.643	0.417064	0.85	621.226
Plot name	Average1	8.8	621.389	2	621.617	0.430044	1.15	621.226
Plot Type	15			3	621.558	0.466092	1.15	622.061
1st free col	8			4	621.403	0.414193	0.85	622.061
Sigma Level	2			5	621.357	0.445442	0.85	621.226
Absolute Errs	TRUE			6	621.26	0.423462	ErrBox	ErrBox
Symbol Type	1			7	621.152	0.421683	1.85	621.187
Inverse Plot	FALSE			8	621.147	0.422521	2.15	621.187
Color Plot	TRUE			IsoLine	IsoLine	IsoLine	2.15	622.047
3D plot	FALSE						1.85	622.047
Linear	FALSE						1.85	621.187
Data Range	Y9:Z16						ErrBox	ErrBox
Filled Symbols	TRUE						2.85	621.091
ConcAge	FALSE						3.15	621.091
ConcSwap	FALSE						3.15	622.024
1st Symbol-row	1						2.85	622.024
							2.85	621.091
							ErrBox	ErrBox
							3.85	620.988
							4.15	620.988
							4.15	621.817
							3.85	621.817
							3.85	620.988
							ErrBox	ErrBox
							4.85	620.912
							5.15	620.912
							5.15	621.803
							4.85	621.803
							4.85	620.912
							ErrBox	ErrBox
							5.85	620.837
							6.15	620.837
							6.15	621.684
							5.85	621.684
							5.85	620.837
							ErrBox	ErrBox
							6.85	620.73
							7.15	620.73
							7.15	621.573
							6.85	621.573
							6.85	620.73
							ErrBox	ErrBox
							7.85	620.725
							8.15	620.725
							8.15	621.57
							7.85	621.57
							7.85	620.725
							ErrBox	ErrBox

## Sheet: PlotDat1
Source sheet	U-Pb Data Table	0.2	621.385	1	621.617	2.67323	0.85	618.944
Plot name	Average2	6.8	621.385	2	621.558	2.89703	1.15	618.944
Plot Type	15			3	621.403	2.5738	1.15	624.29
1st free col	8			4	621.357	2.76779	0.85	624.29
Sigma Level	2			5	621.26	2.6308	0.85	618.944
Absolute Errs	FALSE			6	621.152	2.61929	ErrBox	ErrBox
Symbol Type	1			IsoLine	IsoLine	IsoLine	1.85	618.661
Inverse Plot	FALSE						2.15	618.661
Color Plot	TRUE						2.15	624.455
3D plot	FALSE						1.85	624.455
Linear	FALSE						1.85	618.661
Data Range	Y10:Z15						ErrBox	ErrBox
Filled Symbols	TRUE						2.85	618.829
ConcAge	FALSE						3.15	618.829
ConcSwap	FALSE						3.15	623.976
1st Symbol-row	1						2.85	623.976
							2.85	618.829
							ErrBox	ErrBox
							3.85	618.59
							4.15	618.59
							4.15	624.125
							3.85	624.125
							3.85	618.59
							ErrBox	ErrBox
							4.85	618.63
							5.15	618.63
							5.15	623.891
							4.85	623.891
							4.85	618.63
							ErrBox	ErrBox
							5.85	618.533
							6.15	618.533
							6.15	623.771
							5.85	623.771
							5.85	618.533
							ErrBox	ErrBox

## Sheet: PlotDat3
Source sheet	U-Pb Data Table	0.2	621.385	1	621.617	0.430044	0.85	621.187
Plot name	Average3	6.8	621.385	2	621.558	0.466092	1.15	621.187
Plot Type	15			3	621.403	0.414193	1.15	622.047
1st free col	8			4	621.357	0.445442	0.85	622.047
Sigma Level	2			5	621.26	0.423462	0.85	621.187
Absolute Errs	TRUE			6	621.152	0.421683	ErrBox	ErrBox
Symbol Type	1			IsoLine	IsoLine	IsoLine	1.85	621.091
Inverse Plot	FALSE						2.15	621.091
Color Plot	TRUE						2.15	622.024
3D plot	FALSE						1.85	622.024
Linear	FALSE						1.85	621.091
Data Range	Y10:Z15						ErrBox	ErrBox
Filled Symbols	TRUE						2.85	620.988
ConcAge	FALSE						3.15	620.988
ConcSwap	FALSE						3.15	621.817
1st Symbol-row	1						2.85	621.817
							2.85	620.988
							ErrBox	ErrBox
							3.85	620.912
							4.15	620.912
							4.15	621.803
							3.85	621.803
							3.85	620.912
							ErrBox	ErrBox
							4.85	620.837
							5.15	620.837
							5.15	621.684
							4.85	621.684
							4.85	620.837
							ErrBox	ErrBox
							5.85	620.73
							6.15	620.73
							6.15	621.573
							5.85	621.573
							5.85	620.73
							ErrBox	ErrBox

## Sheet: U-Pb Data Table
Table S4. CA-TIMS zircon U-Pb isotopic data.
										Radiogenic Isotope Ratios									Isotopic Dates
			Th	206Pb*	mol %	Pb*	Pbc	206Pb		208Pb	207Pb		207Pb		206Pb		corr.		207Pb		207Pb		206Pb
Sample	Fraction	LA-ICPMS	U	x10-13 mol	206Pb*	Pbc	(pg)	204Pb		206Pb	206Pb	% err	235U	% err	238U	% err	coef.		206Pb	±	235U	±	238U	±
(a)	used	spot label	(b)	(c)	(c)	(c)	(c)	(d)		(e)	(e)	(f)	(e)	(f)	(e)	(f)			(g)	(f)	(g)	(f)	(g)	(f)
19CW-079-C
z4a		204	1.01347	1.08999	0.991629	40.3817	0.766708	2141.67		0.314981	0.0606456	0.144283	0.847267	0.195628	0.101371	0.0722372	0.802192		625.721	3.11031	623.148	0.911072	622.44	0.428608
z9		239	0.731971	0.978052	0.997769	143.259	0.181473	8088.24		0.227502	0.060484	0.0804998	0.843875	0.14566	0.101235	0.0703774	0.960428		619.963	1.73699	621.282	0.676888	621.643	0.417064
z1	1	201	0.430567	1.47624	0.998701	228.19	0.159362	13889		0.133823	0.0605197	0.075159	0.844334	0.138848	0.101231	0.0725706	0.93772		621.236	1.62141	621.535	0.645422	621.617	0.430044
z4b	1	204	0.521757	1.04625	0.998064	156.705	0.168399	9321.19		0.162167	0.0604979	0.100139	0.843947	0.159814	0.101221	0.0786609	0.863128		620.46	2.16059	621.321	0.742695	621.558	0.466092
z2	1	202	0.396315	1.57165	0.998809	246.621	0.155577	15144.8		0.123179	0.0605596	0.0771417	0.844586	0.13862	0.101194	0.0699187	0.936564		622.656	1.66379	621.673	0.644468	621.403	0.414193
z11	1	241	0.450269	0.432335	0.995506	66.089	0.161979	4014.7		0.139949	0.0605241	0.165497	0.844026	0.215028	0.101186	0.075199	0.757707		621.393	3.57018	621.365	0.999339	621.357	0.445442
z10	1	231	0.668355	0.679171	0.996592	92.2122	0.192749	5294.25		0.207734	0.0604839	0.116006	0.843328	0.171313	0.10117	0.071499	0.857406		619.959	2.50313	620.98	0.795816	621.26	0.423462
z12	1	243	0.436963	0.908056	0.997565	121.825	0.183919	7411.02		0.135815	0.0605121	0.0915379	0.843566	0.15185	0.101151	0.0712104	0.9133		620.964	1.97484	621.112	0.705515	621.152	0.421683
z5		219	0.450572	2.56523	0.999384	484.252	0.131183	29298.9		0.140045	0.0605802	0.0731116	0.844509	0.134808	0.10115	0.0713525	0.931506		623.392	1.57667	621.631	0.626712	621.147	0.422521
Weighted Mean = 621.4 ± 1.1 [0.17%] 95% confidence; MSWD = 0.017, probability = 1.0; n=6
(a) z1, z2, etc. are labels for analyses composed of single zircon grains that were annealed and chemically abraded (Mattinson, 2005). z4a and z4b are fragments from the same grain.
(b) Model Th/U ratio calculated from radiogenic 208Pb/206Pb ratio and 207Pb/235U date.
(c) Pb* and Pbc are radiogenic and common Pb, respectively. mol % 206Pb* is with respect to radiogenic and blank Pb.
(d) Measured ratio corrected for spike and fractionation only. Pb fractionation correction for analyses done with tracer solution BSU1B is 0.16 ± 0.03 (1 sigma) %/amu (atomic mass unit)
for single-collector Daly analyses, based on analysis of EARTHTIME 202Pb-205Pb ET2535 tracer solution.
(e) Corrected for fractionation and spike. Common Pb in zircon analyses is assigned to procedural blank with composition of 206Pb/204Pb = 18.04 ± 0.61%; 207Pb/204Pb = 15.54 ± 0.52%;
208Pb/204Pb = 37.69 ± 0.63% (1 sigma). 206Pb/238U and 207Pb/206Pb ratios corrected for initial disequilibrium in 230Th/238U using a D(Th/U) of 0.20 ± 0.05 (1 sigma).
(f) Errors are 2 sigma, propagated using algorithms of Schmitz and Schoene (2007) and Crowley et al. (2007).
(g) Calculations based on the decay constants of Jaffey et al. (1971). 206Pb/238U and 207Pb/206Pb dates corrected for initial disequilibrium in 230Th/238U using a D(Th/U) of 0.20 ± 0.05 (1 sigma).
Crowley, J.L., Schoene, B., and Bowring, S.A., 2007, U-Pb dating of zircon in the Bishop Tuff at the millennial scale: Geology 35: 1123-1126.
Jaffey, A.H., Flynn, K.F., Glendenin, L.E., Bentley, W.C., and Essling, A.M., 1971, Precision measurements of half-lives and specific activities of 235U and 238U: Physical Review C, 4: 1889-1906.
Mattinson, J.M., 2005, Zircon U-Pb chemical abrasion ("CA-TIMS") method: combined annealing and multi-step partial dissolution analysis for improved precision and accuracy of zircon ages:
Chemical Geology 220:47-66.
Schmitz, M.D., and Schoene, B., 2007, Derivation of isotope ratios, errors and error correlations for U-Pb geochronology using 205Pb-235U-(233U)-spiked isotope dilution thermal ionization
mass spectrometric data: Geochemistry, Geophysics, Geosystems (G3) 8, Q08006, doi:10.1029/2006GC001492.

## Sheet: Info
This Supplemental Material accompanies
White, C.E., Barr, S.M., Crowley, J.L., van Rooyen, D., and MacHattie, T.G., 2022, U-Pb zircon ages and
Sm-Nd isotopic data from the Cobequid Highlands, Nova Scotia, Canada: New contributions to understanding
the Neoproterozoic geologic history of Avalonia, in Kuiper, Y.D., Murphy, J.B., Nance, R.D., Strachan, R.A.,
and Thompson, M.D., eds., New Developments in the Appalachian-Caledonian-Variscan Orogen: Geological
Society of America Special Paper 554, https://doi.org/10.1130/2021.2554(07).
